# Supplementary material for: Pathogenic Leptospira Species in Insectivorous Bats, China, 2015
Source: PubMed Central journal article supplement (PMC6004874; doi:10.3201/eid2406.171585), 2018-06
Supplement: 17-1585-Techapp-s1.pdf [file 17-1585-Techapp-s1.pdf]

# Pathogenic *Leptospira* Species in Insectivorous Bats, China, 2015

## Technical Appendix

**Technical Appendix Table.** Multilocus sequence typing (MLST) of *Leptospira* in bats, Mengyin County, Shandong Province, China

| Bat species          | Bat no. | <i>glmU</i> | <i>pntA</i> | <i>sucA</i> | <i>tpiA</i> | <i>pfkB</i> | <i>mreA</i> | <i>caiB</i> | ST    | Co-infection |
|----------------------|---------|-------------|-------------|-------------|-------------|-------------|-------------|-------------|-------|--------------|
| <i>M. fimbriatus</i> | SD-88   | Lk (62)     | Lk (73)     | Lk (68)     | Lk (63)     | Lk (88)     | Lk (65)     | Lk (60)     | ST246 | 1            |
| <i>M. fimbriatus</i> | SD-112  | Lk (63)     | Lk (74)     | Lk (69)     | Lk (64)     | Lk (89)     | Lk (66)     | Lk (60)     | ST245 | 1            |
| <i>M. fimbriatus</i> | SD-124  | Lb          | —           | Lb          | —           | —           | —           | —           | —     | 1            |
| <i>M. fimbriatus</i> | SD-122  | N1          | N1          | N1          | —           | —           | N1          | —           | —     | 1            |
| <i>M. fimbriatus</i> | SD-93   | N1          | N1          | N1          | N1          | N1          | —           | —           | —     | 1            |
| <i>M. fimbriatus</i> | SD-103  | Lb          | —           | N2          | Lb          | Lb          | Lb          | —           | —     | 2            |
| <i>M. fimbriatus</i> | SD-102  | N1          | —           | N1/N2       | N1          | N1/Lb       | N1          | —           | —     | 3            |
| <i>M. ricketti</i>   | SD-92   | N1          | N1          | N1/Lb       | N1          | N1          | N1          | —           | —     | 2            |
| <i>M. pequinius</i>  | SD-49   | Lk (61)     | Lk (72)     | Lk (67)     | Lk (62)     | Lk (87)     | Lk (64)     | Lk (59)     | ST244 | 1            |
| <i>M. pequinius</i>  | SD-10   | Lk          | Lk          | Lk          | —           | Lk          | Lk          | Lk          | —     | 1            |
| <i>M. pequinius</i>  | SD-15   | Lk          | Lk          | Lk          | —           | Lk          | Lk          | Lk          | —     | 1            |
| <i>M. pequinius</i>  | SD-36   | Lk          | Lk          | Lk          | —           | Lk          | —           | —           | —     | 1            |
| <i>M. pequinius</i>  | SD-21   | Lb          | —           | —           | —           | —           | —           | —           | —     | 1            |
| <i>M. pequinius</i>  | SD-23   | Lb          | —           | Lb          | Lb          | Lb          | —           | Lb          | —     | 1            |
| <i>M. pequinius</i>  | SD-38   | Lb          | —           | Lb          | Lb          | Lb          | —           | —           | —     | 1            |
| <i>M. pequinius</i>  | SD-8    | N1          | N1          | N1          | —           | —           | N1          | —           | —     | 1            |
| <i>M. pequinius</i>  | SD-30   | N1          | N1          | N1          | —           | N1          | N1          | —           | —     | 1            |
| <i>M. pequinius</i>  | SD-62   | N1          | N1          | N1          | —           | N1          | N1          | —           | —     | 1            |
| <i>M. pequinius</i>  | SD-41   | N1          | N1          | N1          | N1          | N1          | —           | —           | —     | 1            |
| <i>M. pequinius</i>  | SD-39   | N1          | —           | N1          | —           | N1          | N1          | —           | —     | 1            |
| <i>M. pequinius</i>  | SD-25   | Lk          | Lk          | Lk          | —           | Lb          | —           | Lk          | —     | 2            |
| <i>M. pequinius</i>  | SD-9    | Lk          | Lk          | Lk          | Lb          | Lk          | Lk          | Lk          | —     | 2            |
| <i>M. pequinius</i>  | SD-27   | Lk          | Lk          | Lk          | Lb          | Lk          | Lk          | Lk          | —     | 2            |
| <i>M. pequinius</i>  | SD-3    | Lb          | —           | Lb          | —           | N2          | Lb          | —           | —     | 2            |
| <i>M. pequinius</i>  | SD-40   | Lb          | —           | Lb          | —           | N2          | Lb          | —           | —     | 2            |
| <i>M. pequinius</i>  | SD-5    | Lb          | N1          | N1          | —           | Lb          | —           | —           | —     | 2            |
| <i>M. pequinius</i>  | SD-69   | Lb          | N2          | N2          | —           | Lb          | Lb          | —           | —     | 2            |
| <i>M. pequinius</i>  | SD-33   | Lb          | Lk          | N2          | —           | Lb          | Lb          | —           | —     | 2            |
| <i>M. pequinius</i>  | SD-37   | Lb          | —           | N2          | —           | Lb          | Lb          | —           | —     | 2            |
| <i>M. pequinius</i>  | SD-45   | Lb          | —           | N2          | —           | Lb          | Lb          | —           | —     | 2            |
| <i>M. pequinius</i>  | SD-26   | N1          | Lk          | N1          | N1          | N1          | N1          | Lk          | —     | 2            |
| <i>M. pequinius</i>  | SD-31   | Lb          | N1          | Lb          | Lb          | N2          | N1          | —           | —     | 3            |
| <i>M. pequinius</i>  | SD-16   | Lb          | N1          | Lb          | —           | N2          | Lb          | —           | —     | 3            |
| <i>M. pequinius</i>  | SD-11   | Lb          | Lk          | N4          | —           | —           | —           | Lk          | —     | 3            |
| <i>M. pequinius</i>  | SD-17   | N1          | N1          | N3          | N1          | N1          | N1          | Lk          | —     | 3            |

\*For SD-49, SD-88, and SD-112, novel alleles assigned are shown in the parentheses. Lb, *L. borgpetersenii*; Lk, *L. kirschneri*; N1, potential new *Leptospira* sp. 1; N2, potential new *Leptospira* sp. 2; N3, potential new *Leptospira* sp. 3; N4, potential new *Leptospira* sp.

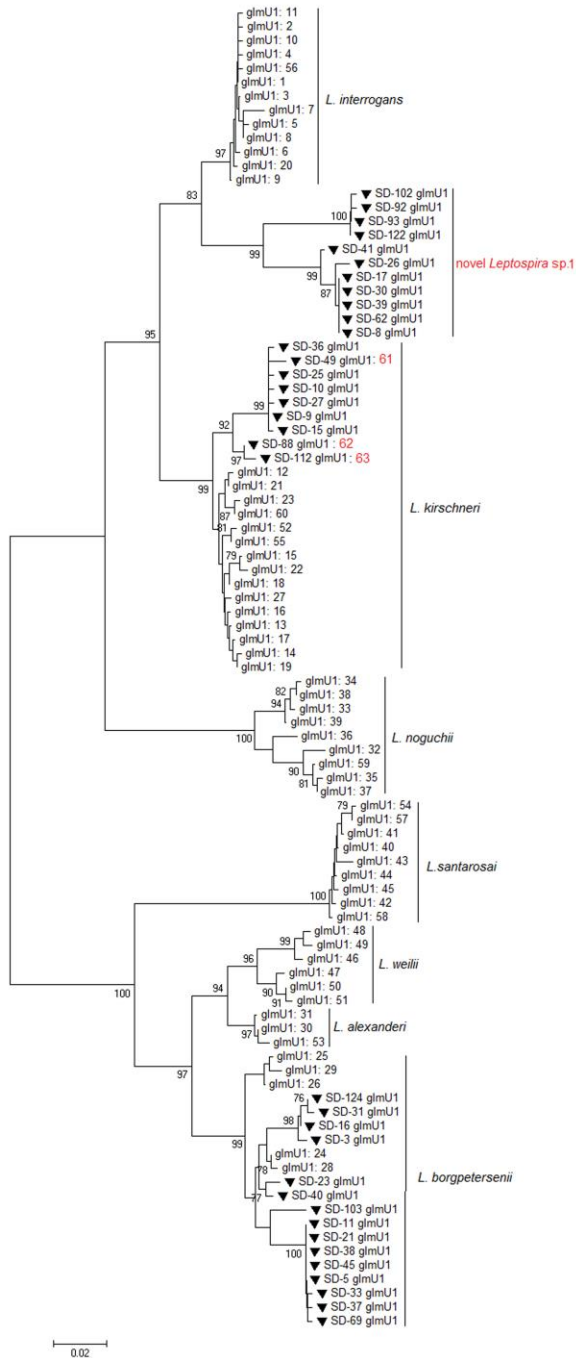

**Technical Appendix Figure 1.** Neighbor-joining phylogenetic tree for *glmU* gene of *Leptospira* in bats, Mengyin County, Shandong Province, China. The tree was constructed with Kimura's 2-parameter model using MEGA 7.0, and bootstrap values were calculated with 1,000 replicates. Alleles of each locus detected in this study are shown with the sample number highlighted with a triangle, and novel allele numbers assigned in this study are indicated in red. *Leptospira* species are shown on the right, and potential new *Leptospira* species detected in this study are shown in red.

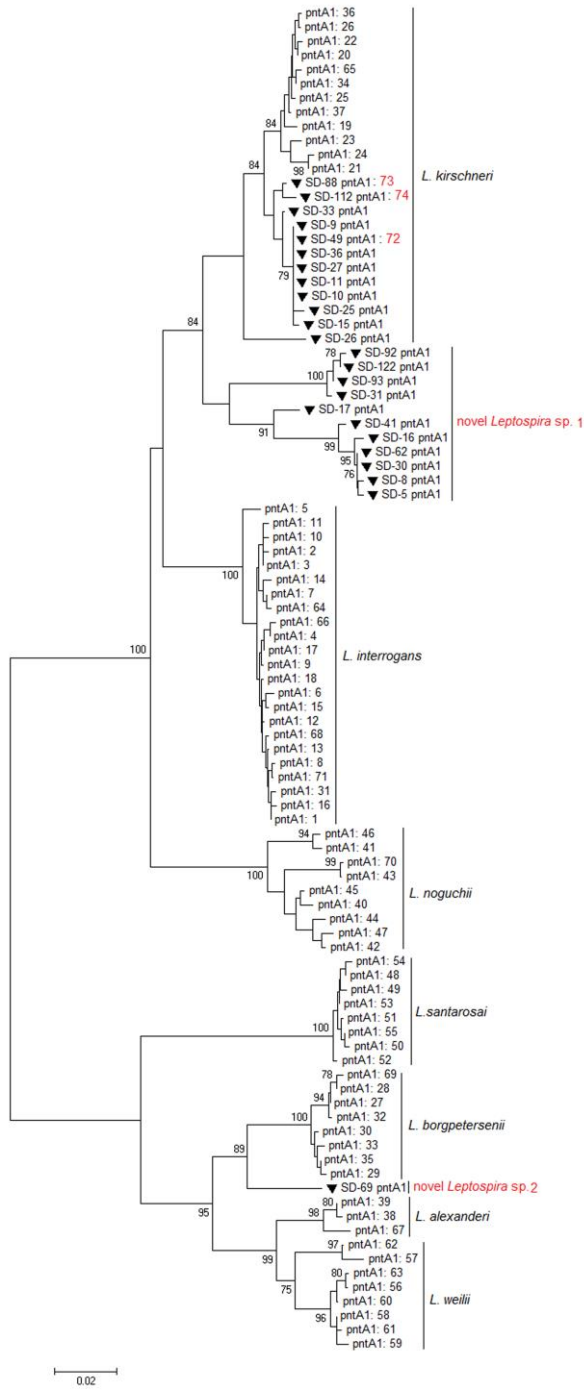

**Technical Appendix Figure 2.** Neighbor-joining phylogenetic tree for *pntA* gene of *Leptospira* in bats, Mengyin County, Shandong Province, China. The tree was constructed with Kimura's 2-parameter model using MEGA 7.0, and bootstrap values were calculated with 1,000 replicates. Alleles of each locus detected in this study are shown with the sample number highlighted with a triangle, and novel allele numbers assigned in this study are indicated in red. *Leptospira* species are shown on the right, and potential new *Leptospira* species detected in this study are shown in red.

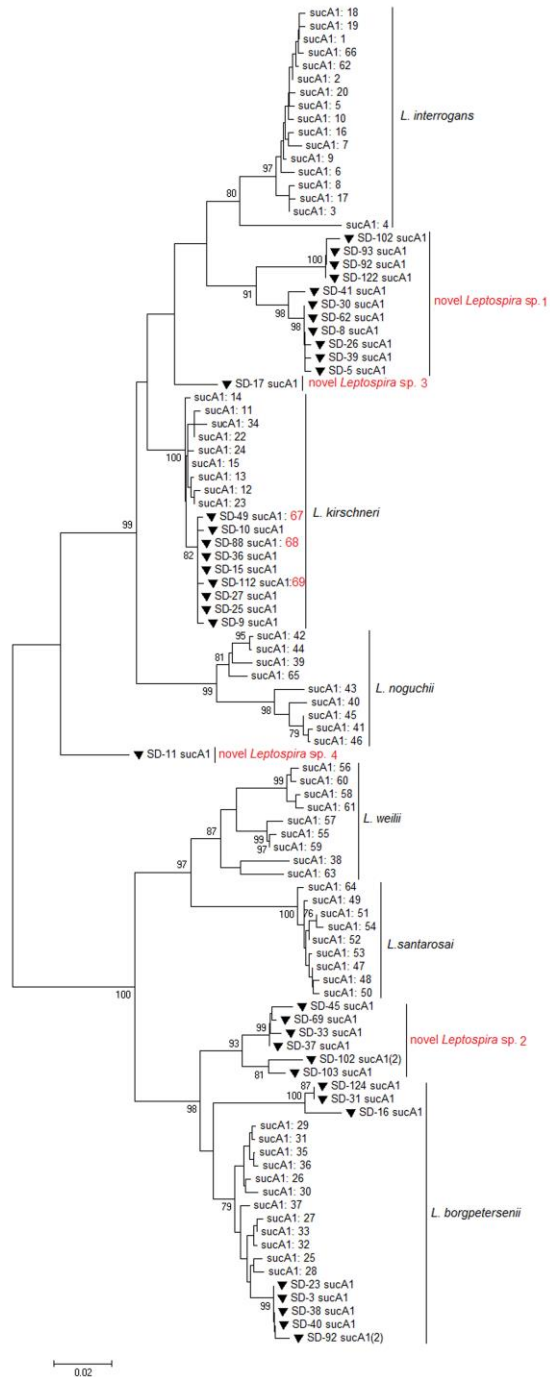

**Technical Appendix Figure 3.** Neighbor-joining phylogenetic tree for *sucA* gene of *Leptospira* in bats, Mengyin County, Shandong Province, China. The tree was constructed with Kimura's 2-parameter model using MEGA 7.0, and bootstrap values were calculated with 1,000 replicates. Alleles of each locus detected in this study are shown with the sample number highlighted with a triangle, and novel allele numbers assigned in this study are indicated in red. *Leptospira* species are shown on the right, and potential new *Leptospira* species detected in this study are shown in red.

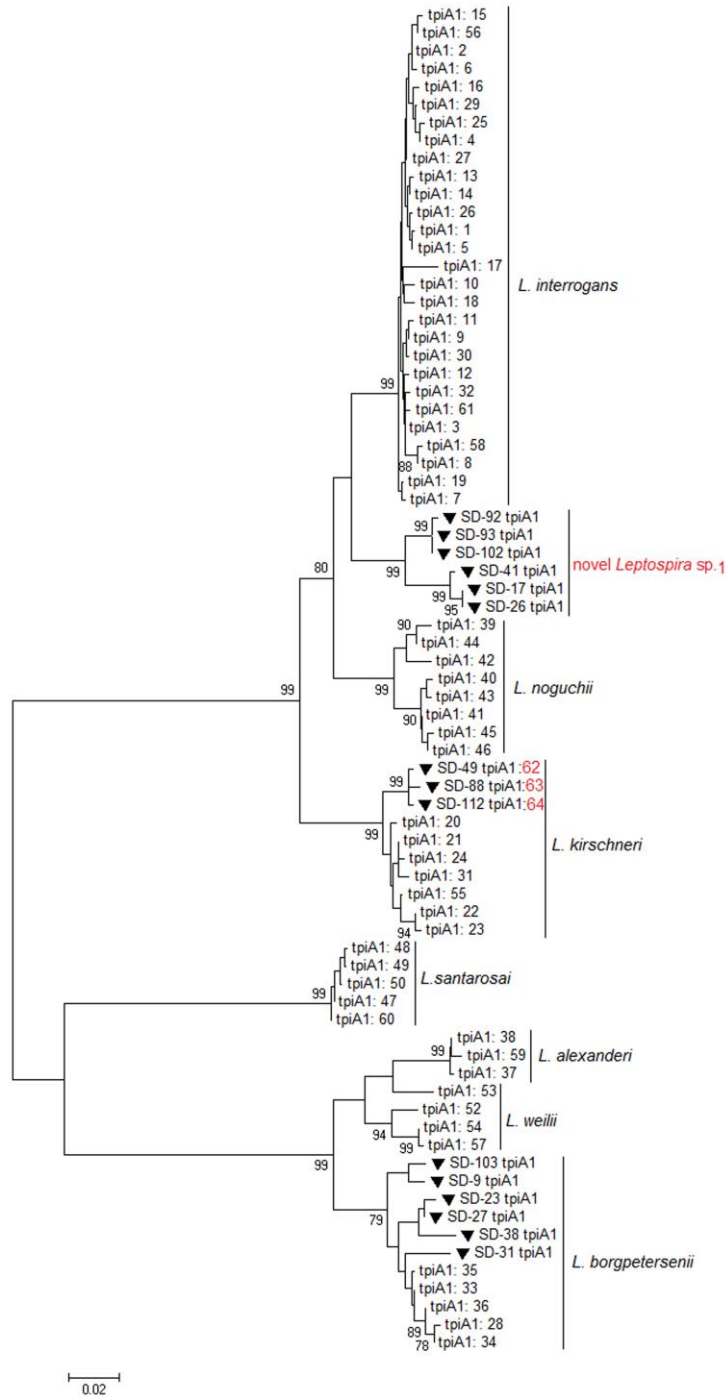

**Technical Appendix Figure 4.** Neighbor-joining phylogenetic tree for *tpiA* gene of *Leptospira* in bats, Mengyin County, Shandong Province, China. The tree was constructed with Kimura's 2-parameter model using MEGA 7.0, and bootstrap values were calculated with 1,000 replicates. Alleles of each locus detected in this study are shown with the sample number highlighted with a triangle, and novel allele numbers assigned in this study are indicated in red. *Leptospira* species are shown on the right, and potential new *Leptospira* species detected in this study are shown in red.

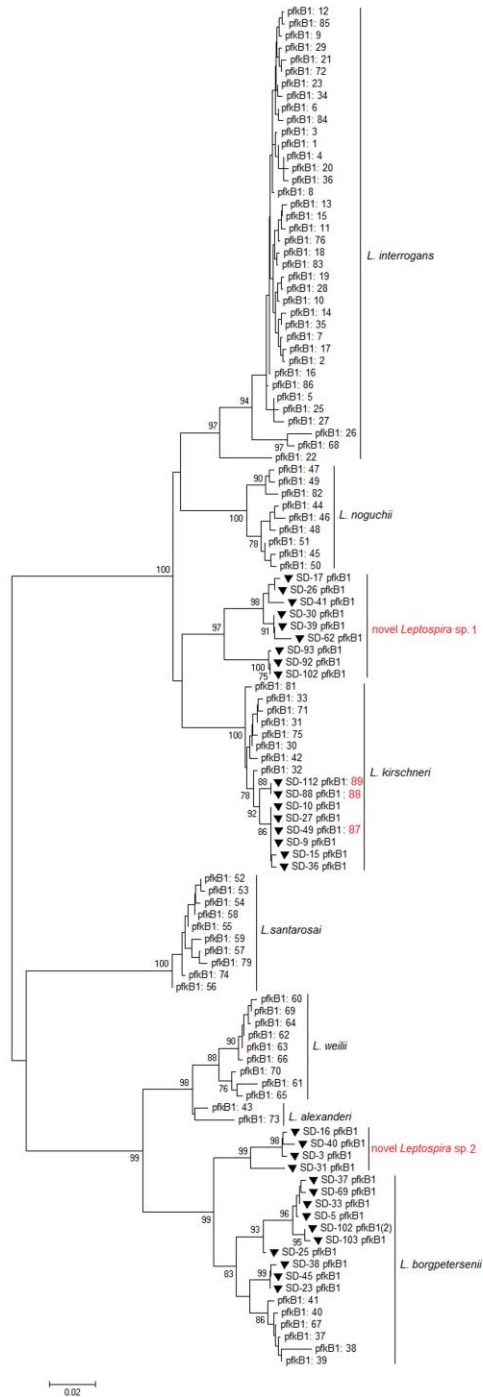

**Technical Appendix Figure 5.** Neighbor-joining phylogenetic tree for *pfkB* gene of *Leptospira* in bats, Mengyin County, Shandong Province, China. The tree was constructed with Kimura's 2-parameter model using MEGA 7.0, and bootstrap values were calculated with 1,000 replicates. Alleles of each locus detected in this study are shown with the sample number highlighted with a triangle, and novel allele numbers assigned in this study are indicated in red. *Leptospira* species are shown on the right, and potential new *Leptospira* species detected in this study are shown in red.

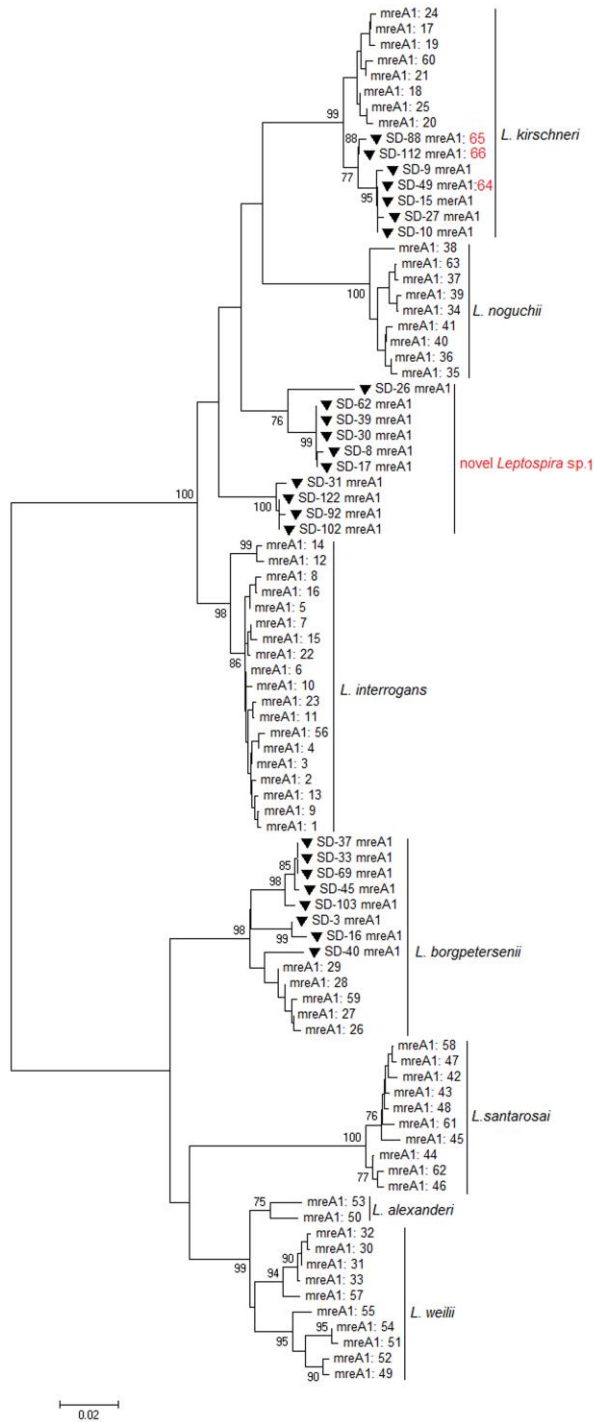

**Technical Appendix Figure 6.** Neighbor-joining phylogenetic tree for *mreA* gene of *Leptospira* in bats, Mengyin County, Shandong Province, China. The tree was constructed with Kimura's 2-parameter model using MEGA 7.0, and bootstrap values were calculated with 1,000 replicates. Alleles of each locus detected in this study are shown with the sample number highlighted with a triangle, and novel allele numbers assigned in this study are indicated in red. *Leptospira* species are shown on the right, and potential new *Leptospira* species detected in this study are shown in red.

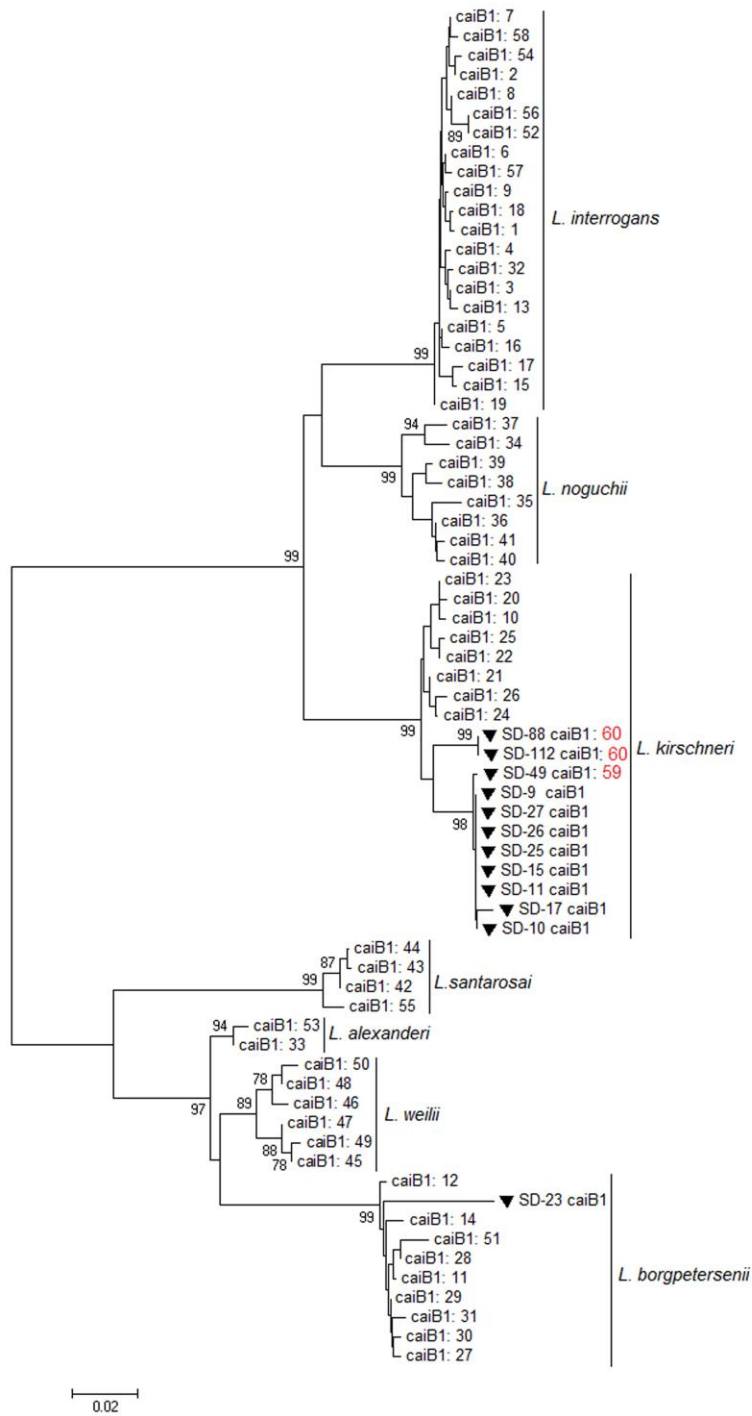

**Technical Appendix Figure 7.** Neighbor-joining phylogenetic tree for *caiB* gene of *Leptospira* in bats, Mengyin County, Shandong Province, China. The tree was constructed with Kimura's 2-parameter model using MEGA 7.0, and bootstrap values were calculated with 1,000 replicates. Alleles of each locus detected in this study are shown with the sample number highlighted with a triangle, and novel allele numbers assigned in this study are indicated in red. *Leptospira* species are shown on the right, and potential new *Leptospira* species detected in this study are shown in red.
